# Supplementary material for: Metabolomics Based Identification of SIRT5 and Protein Kinase C Epsilon Regulated Pathways in Brain
Source: Front Neurosci. 2018 Jan 30;12:32. doi: 10.3389/fnins.2018.00032 (PMC5797631; doi:10.3389/fnins.2018.00032)
Supplement: Supplementary file 1 [file Table1.XLSX]

## Sheet: Sheet1
	Table 1. List of Primers for qPCR and Antibodies for Western Blot and Immunofluorescence
	Gene Name	Protein	Primer F 5'->3'	Primer R 5'->3'
	SLC2A1	glucose transporter 1	TTCTCTGTCGGCCTCTTTGT	GAGAAGCCCATAAGCACAGC
	MCT1	monocarboxylate transporter 1	ATTCAGTGCAACGACCAGTG	CGGCTGCCGTATTTATTCAC
	FABP7	fatty acid binding protein 7	CCAGCTGGGAGAAGAGTTTG	TTTCTTTGCCATCCCACTTC
	FATP	fatty acid transport protein	TGCTCCTGTACTTGGGGTCT	GCACCTTGGTCTTCACCTTC
	SLC7A7	Y+L amino acid transporter 1	CCCTAAGGGTGTGCTCATGT	ATGGTGGTACCCAGTTCAGC
	SLC7A5	large neutral amino acid transporter	GACGAACCTGGCCTATTTCA	CAGGACATGACACCCAAGTG
	EAAT1	excitatory amino acid transporter 1	ATTGGTCGCGGTGATAATGT	GTCACGGTGTACATGGCAAG
	EAAT2	excitatory amino acid transporter 2	GGGGAAAAATCTCCTGCTCT	ATGACCACATCAGGGTGGAT
	GLUD1	glutamate dehydrogenase 1	TGGGATTGACCCAAAAGAAC	TGTCACAGTCAGCCTCCAAG
	GLUL	glutamine synthetase	ACTGTGAGCCCAAGTGTGTG	ATGGCAACAGGATGGAGGTA
	GLS2	glutaminase 2	CGTTAGACAAGCTGGGGAAC	GTCTAACTTCCGAGCGCAGT
	GAD1	glutamate decarboxylase 1	CGGGAGCGGATCCTAATACT	CACAGATCTTCAGGCCCAGT
	ACACA	acetyl-CoA carboxylase 1	GATGGTTTGGCCTTTCACAT	GCTGGAGAAGCCACAGTGA
	ACLY	ATP citrate lyase	TGGAGTCAAATCCTGGCTAAA	GGACGAAGGGTTCAATGAGA
	CPT1C	carnitine palmitoyltransferase 1	GGACCCTTCCCTAGGACTGA	GATGCAAAAACTGCTGCTGA
	ACADS	acyl-CoA dehydrogenase short chain	TATTTGCCAGCACAGACAGG	GCCCAGCTTGTCTTCCTTC
	ACADM	acyl-CoA dehydrogenase medium chain	CATCAAAAGAGCCTGGGAAC	CACCCATACGCCAACTCTTC
	HADHB	3-ketoacyl-CoA thiolase	CAGCGCCTGTCCTTACTCAG	GCCCATGGTCTCATTAGTGG
	ECI	enoyl-CoA isomerase 1	CCCTCAGCTTGGAGTGTCTC	CCAGGCCAGCTGAGAAGATA
	MDH1	malate dehydrogenase 1, cytoslic	GGCACAGCCTTGGAGAAATA	TGTCAGGCAGTTCGTATTGG
	MDH2	malate dehydrogenase 2, mitochondrial	AAGCCATGGTTTGCATCATT	CACACCGTGCTTCTTGAAAA
	SUCLG2	succinyl-CoA ligase, GTP	GCTGGAGGAAGAGGAAAAGG	GTTGAGCCAACTCTCCCACT
	PDHE1	pyruvate dehydrogenase e1 alpha	TCTGTCACTTGTGTGATGGTCA	TGAAGCCATGTGCTCGATAG
	SDHA	succinate dehydrogenase subunit A	AGCTCCTGCCTCTGTGGTT	CCAAACTTGAGGCTCTGTCC
	G6PDX	Glucose 6-phosphate dehydrogenase x-linked	ACGACATCCGAAAGCAGAGT	TTACGGGCAAAGAACTCCTC
	PRPS1	phosphoribosyl pyrophosphate synthetase	CCCGCCAAGATAAGAAGGAT	TGCATGTAGATCCATGGTGA
	PPAT	phosphoribosyl pyrophosphate amidotransferase	TGCCTAAATTCAGGGTGCAT	CGTATGTCCGATTCCAAGGT
	XDH	Xanthine dehydrogenase	ATGACCGCCTTCAGAACAAG	GGTGTTTCCTATGCCTTCCA
	Ab Name	Dilution	Source	Catalog No.
	β-Actin	WB - 1:5,000	Cell Signaling	3700S
	Sirt5	WB - 1:500; IF - 1:50	WB - Cell Signaling; IF - Santa Cruz	WB - D8C3; IF - sc-271635
	Lamin A/C	WB - 1:1000	Cell Signaling	4C11
	COX IV	WB - 1:1000	Cell Signaling	3E11
	HSP90	WB - 1:1000	ThermoFisher Scientific	MA1-10372
	GFAP	IF - 1:2000	Abcam	ab4674
	NeuN	IF - 1:400	Cell Signaling	D3S3I
	Tie-2	IF - 1:50	Santa Cruz	c-20
	Olig2	IF - 1:200	Millipore	ab9610
	Iba1	IF - 1:400	Wako-chem	019-19741
