# Supplementary material for: Metabolomics Based Identification of SIRT5 and Protein Kinase C Epsilon Regulated Pathways in Brain
Source: Front Neurosci. 2018 Jan 30;12:32. doi: 10.3389/fnins.2018.00032 (PMC5797631; doi:10.3389/fnins.2018.00032)
Supplement: Supplementary file 2 [file Table2.XLSX]

## Sheet: Known
	Table S2. All structurally annotated metabolites in SIRT5-/- cortex*
	Metabolite Name	p-value	FDR	Fold change
	glycerol-3-galactoside	5.44e-05	0.0060917	0.32455
	adenosine	0.0020525	0.086034	3.6774
	xylitol	0.0035765	0.086034	1.3679
	pentadecanoic acid	0.0036654	0.086034	1.3431
	urea	0.0044202	0.086034	1.389
	lyxitol	0.004609	0.086034	1.2603
	oxalic acid	0.0056388	0.090221	1.3425
	hexitol	0.0089934	0.12591	1.5355
	butyrolactam NIST	0.01138	0.12986	1.2459
	adenine	0.011595	0.12986	1.2568
	valine	0.013513	0.13758	1.1701
	cholestan-3-ol	0.015057	0.14053	0.68704
	malic acid	0.016656	0.14086	1.2342
	glycine	0.018617	0.14086	1.2861
	stearic acid	0.018865	0.14086	1.1716
	myristic acid	0.020405	0.14097	1.3367
	xanthine	0.021397	0.14097	1.3806
	palmitic acid	0.032871	0.19902	1.1605
	erythritol	0.033763	0.19902	1.2217
	glutamic acid	0.036046	0.20186	0.90094
	heptadecanoic acid	0.04008	0.21376	1.1416
	threonic acid	0.042532	0.21653	1.2934
	isoleucine	0.04578	0.22132	1.1769
	diacetone alcohol NIST	0.047426	0.22132	1.2402
	pyruvic acid	0.050335	0.2255	1.6867
	inosine 5'-monophosphate	0.05439	0.23429	0.61796
	tryptophan	0.070075	0.27811	0.87228
	sebacic acid, di2-octyl ester NIST	0.071616	0.27811	1.2516
	taurine	0.075899	0.27811	1.2928
	leucine	0.077393	0.27811	1.19
	phosphoethanolamine	0.078889	0.27811	0.62806
	cholesterol	0.07946	0.27811	0.80069
	methanolphosphate	0.082883	0.2813	1.1584
	sucrose	0.086682	0.28427	1.43
	pantothenic acid	0.088834	0.28427	1.2537
	glucose	0.10797	0.33592	1.1842
	octadecanol	0.12139	0.36746	1.3691
	uridine	0.12991	0.36949	1.4183
	1-monostearin	0.12993	0.36949	1.2721
	succinic acid	0.13196	0.36949	1.9833
	guanosine	0.14124	0.38583	1.4413
	hypoxanthine	0.14943	0.39848	0.89612
	glycerol-alpha-phosphate	0.15697	0.40827	1.2961
	citric acid	0.16039	0.40827	0.84645
	beta-alanine	0.17227	0.42876	1.1446
	oleic acid	0.18361	0.44338	0.87085
	threonine	0.18606	0.44338	1.1109
	N-acetylaspartic acid	0.20024	0.46723	0.9101
	uracil	0.20882	0.46791	1.2165
	2,5-dihydroxypyrazine NIST	0.20889	0.46791	0.92325
	isothreonic acid	0.23745	0.51501	1.1151
	homoserine	0.23911	0.51501	0.88644
	histidine	0.24423	0.5161	0.85498
	UDP-N-acetylglucosamine	0.25839	0.53593	0.87709
	aconitic acid	0.2705	0.54931	1.2007
	fructose	0.27465	0.54931	1.244
	alanine	0.2931	0.57162	1.1001
	3-hydroxybutyric acid	0.2983	0.57162	1.318
	glyceric acid	0.30112	0.57162	1.0734
	conduritol-beta-epoxide	0.31436	0.58046	1.1449
	glutamine	0.32081	0.58046	0.89779
	pelargonic acid	0.32133	0.58046	1.2469
	sorbitol	0.33921	0.60304	1.1031
	1-monoolein	0.36624	0.64093	0.84305
	5'-deoxy-5'-methylthioadenosine	0.37488	0.64594	1.127
	2-monoolein	0.39128	0.66399	0.84932
	ribonic acid	0.39972	0.66819	0.69112
	4-aminobutyric acid	0.43131	0.69451	1.1013
	methionine	0.43332	0.69451	1.0602
	arachidic acid	0.43961	0.69451	1.0879
	fumaric acid	0.44503	0.69451	1.0583
	lysine	0.45249	0.69451	0.81447
	tyrosine	0.45267	0.69451	0.90664
	pyrophosphate	0.469	0.70984	0.91541
	galactose	0.48102	0.71833	0.97856
	1-monopalmitin	0.49148	0.72429	1.1325
	ornithine	0.49848	0.72506	0.92979
	2,3-dihydroxypyridine	0.51231	0.73562	0.89553
	glycerol	0.52631	0.7416	1.0492
	nicotinamide	0.52972	0.7416	0.97386
	adenosine-5-monophosphate	0.57473	0.79468	0.9398
	myo-inositol	0.58184	0.79471	1.0695
	oxoproline	0.59159	0.79828	1.0497
	2-hydroxyglutaric acid	0.6287	0.83826	0.86772
	levoglucosan	0.67551	0.87709	0.90773
	creatinine	0.68459	0.87709	0.96116
	aminomalonate	0.68782	0.87709	1.0741
	isocitric acid	0.69661	0.87709	0.97412
	glycolic acid	0.70096	0.87709	1.1059
	methyltetrahydrophenanthrenone NIST	0.72297	0.87709	1.1231
	glucose-1-phosphate	0.72446	0.87709	1.0513
	ethanolamine	0.725	0.87709	1.0779
	zymosterol	0.7283	0.87709	1.0976
	cysteine	0.73786	0.87916	1.0167
	aspartic acid	0.74794	0.88178	0.95441
	lactic acid	0.79068	0.91164	1.0391
	phenylalanine	0.79176	0.91164	0.97267
	pseudo uridine	0.79769	0.91164	1.0255
	hydroxylamine	0.8219	0.92983	1.1391
	asparagine	0.83152	0.92985	0.98289
	phosphate	0.83853	0.92985	0.99342
	maltose	0.86027	0.94059	0.8637
	beta-glycerolphosphate	0.86501	0.94059	1.0085
	inositol-4-monophosphate	0.9136	0.98387	1.017
	inosine	0.93087	0.99293	1.0252
	arachidonic acid	0.94315	0.99654	1.0141
	dodecanoic acid, isopropanol ester NIST	0.96626	0.99881	0.98804
	ribitol	0.98039	0.99881	1.001
	3-hydroxy-3-methylglutaric acid	0.98393	0.99881	0.98343
	hydroxycarbamate NIST	0.99048	0.99881	1.0544
	dehydroascorbic acid	0.9905	0.99881	1.004
	serine	0.99881	0.99881	0.99838
	*Data from non-targeted primary metabolomics analysis of Tat-WT and Tat-SIRT5-/- cortex. Only structurally annotated metabolites are presented. Fold change is with respect to Tat-WT
