# Supplementary material for: Metabolomics Based Identification of SIRT5 and Protein Kinase C Epsilon Regulated Pathways in Brain
Source: Front Neurosci. 2018 Jan 30;12:32. doi: 10.3389/fnins.2018.00032 (PMC5797631; doi:10.3389/fnins.2018.00032)
Supplement: Supplementary file 3 [file Table3.XLSX]

## Sheet: Known
	Table S3. All Structurally Annotated Metabolites in WT with PKCε Activation*
	Metabolite Name	p-value	FDR	Fold change
	urea	0.0030968	0.34684	1.2319
	glutamine	0.01463	0.61337	0.7701
	xylitol	0.01643	0.61337	1.306
	histidine	0.023175	0.61816	0.74022
	pentadecanoic acid	0.027597	0.61816	1.3359
	ornithine	0.058987	0.94363	0.804
	cholestan-3-ol	0.076055	0.94363	0.76299
	beta-glycerolphosphate	0.097147	0.94363	0.65014
	1-monostearin	0.10264	0.94363	1.2885
	pyruvic acid	0.111	0.94363	1.4983
	oxalic acid	0.14161	0.94363	1.2387
	uridine	0.15117	0.94363	1.2496
	methanolphosphate	0.16341	0.94363	1.2387
	2,3-dihydroxypyridine	0.18888	0.94363	0.74305
	oleic acid	0.19142	0.94363	0.85197
	serine	0.19807	0.94363	1.0569
	galactose	0.19933	0.94363	0.75519
	isothreonic acid	0.2083	0.94363	1.0952
	cysteine	0.21807	0.94363	0.87873
	glucose	0.21913	0.94363	0.91137
	valine	0.22278	0.94363	1.0916
	tryptophan	0.22312	0.94363	0.90723
	glyceric acid	0.22689	0.94363	1.0711
	uracil	0.22978	0.94363	1.2134
	pantothenic acid	0.23687	0.94363	0.82452
	octadecanol	0.24371	0.94363	1.2344
	myristic acid	0.24785	0.94363	1.1499
	pseudo uridine	0.25169	0.94363	1.08
	erythritol	0.2641	0.94363	1.0816
	glycerol-3-galactoside	0.26904	0.94363	0.83634
	homoserine	0.26995	0.94363	0.87277
	cholesterol	0.27199	0.94363	0.88758
	2-monoolein	0.27803	0.94363	0.81205
	lysine	0.28999	0.95494	0.71865
	phenylalanine	0.30494	0.95494	0.91207
	isoleucine	0.32341	0.95494	1.0843
	hexitol	0.33018	0.95494	1.0913
	phosphoethanolamine	0.3322	0.95494	0.86543
	lyxitol	0.33584	0.95494	1.0607
	arachidic acid	0.3413	0.95494	0.85576
	inositol-4-monophosphate	0.36779	0.95494	0.88921
	fumaric acid	0.39745	0.95494	0.94815
	UDP-N-acetylglucosamine	0.42564	0.95494	1.1229
	butyrolactam NIST	0.43252	0.95494	1.0608
	sebacic acid, di2-octyl ester NIST	0.43687	0.95494	0.90033
	lactic acid	0.44633	0.95494	1.0695
	aconitic acid	0.45113	0.95494	1.2521
	taurine	0.45133	0.95494	1.1124
	conduritol-beta-epoxide	0.47619	0.95494	0.89855
	methyltetrahydrophenanthrenone NIST	0.47709	0.95494	1.1741
	leucine	0.48157	0.95494	1.0702
	succinic acid	0.51033	0.95494	1.387
	threonine	0.52038	0.95494	1.042
	pyrophosphate	0.53085	0.95494	0.93649
	ribonic acid	0.53269	0.95494	1.2091
	alanine	0.53464	0.95494	1.0555
	5'-deoxy-5'-methylthioadenosine	0.53643	0.95494	1.0695
	threonic acid	0.53993	0.95494	1.1378
	1-monopalmitin	0.5501	0.95494	0.89632
	4-aminobutyric acid	0.55753	0.95494	1.1281
	inosine	0.57288	0.95494	0.95111
	adenosine	0.57673	0.95494	1.5145
	glycolic acid	0.57986	0.95494	0.93743
	ribitol	0.58855	0.95494	1.0816
	asparagine	0.59459	0.95494	1.038
	malic acid	0.61475	0.95494	0.97607
	tyrosine	0.62665	0.95494	0.93555
	glycine	0.63868	0.95494	1.078
	1-monoolein	0.64474	0.95494	0.91569
	isocitric acid	0.64809	0.95494	0.95826
	myo-inositol	0.65287	0.95494	1.0526
	2-hydroxyglutaric acid	0.66524	0.95494	1.074
	guanosine	0.68346	0.95494	0.96809
	adenosine-5-monophosphate	0.69372	0.95494	1.1339
	diacetone alcohol NIST	0.69586	0.95494	1.1
	citric acid	0.70153	0.95494	0.98143
	hydroxylamine	0.70241	0.95494	1.0114
	hypoxanthine	0.70641	0.95494	0.97882
	phosphate	0.70706	0.95494	1.021
	N-acetylaspartic acid	0.70855	0.95494	0.97521
	maltose	0.71381	0.95494	0.99595
	aspartic acid	0.72027	0.95494	0.9466
	ethanolamine	0.72382	0.95494	0.96469
	beta-alanine	0.73205	0.95494	1.0203
	levoglucosan	0.73792	0.95494	0.90898
	dodecanoic acid, isopropanol ester NIST	0.741	0.95494	0.91866
	stearic acid	0.75527	0.95494	0.98375
	adenine	0.77148	0.95494	1.0232
	aminomalonate	0.80773	0.95494	0.99176
	nicotinamide	0.81772	0.95494	1.0138
	zymosterol	0.82807	0.95494	1.0014
	xanthine	0.83033	0.95494	1.0329
	methionine	0.83078	0.95494	0.97261
	oxoproline	0.83623	0.95494	1.0205
	hydroxycarbamate NIST	0.83644	0.95494	1.082
	sorbitol	0.83749	0.95494	1.0248
	3-hydroxybutyric acid	0.84014	0.95494	1.0601
	pelargonic acid	0.85532	0.95494	1.0435
	dehydroascorbic acid	0.86563	0.95494	1.0432
	3-hydroxy-3-methylglutaric acid	0.86776	0.95494	1.0376
	glycerol	0.87235	0.95494	0.97102
	sucrose	0.89169	0.95494	1.3521
	heptadecanoic acid	0.89295	0.95494	1.0332
	inosine 5'-monophosphate	0.89502	0.95494	0.97014
	2,5-dihydroxypyrazine NIST	0.89526	0.95494	0.9957
	glycerol-alpha-phosphate	0.92552	0.96882	1.0394
	arachidonic acid	0.92557	0.96882	1.0062
	palmitic acid	0.95279	0.97624	1.0108
	glutamic acid	0.95649	0.97624	1.0168
	glucose-1-phosphate	0.96045	0.97624	1.0331
	creatinine	0.96752	0.97624	0.98825
	fructose	0.98214	0.98214	1.0027
	*Data from non-targeted primary metabolomics analysis of Tat-WT and ΨεRACK-WT cortex. Only structurally annotated metabolites are presented. Fold change is with respect to Tat-WT
