# Supplementary material for: Metabolomics Based Identification of SIRT5 and Protein Kinase C Epsilon Regulated Pathways in Brain
Source: Front Neurosci. 2018 Jan 30;12:32. doi: 10.3389/fnins.2018.00032 (PMC5797631; doi:10.3389/fnins.2018.00032)
Supplement: Supplementary file 4 [file Table4.XLSX]

## Sheet: Known
	Table S4. Structurally Annotated Metabolites in SIRT5-/- with PKCε Activation*
	Metabolite Name	p-value	FDR	Fold change
	glucose-1-phosphate	0.039412	0.97535	0.67924
	pseudo uridine	0.058582	0.97535	0.79255
	sebacic acid, di2-octyl ester NIST	0.070704	0.97535	0.7624
	aminomalonate	0.092558	0.97535	1.3988
	UDP-N-acetylglucosamine	0.10442	0.97535	1.3652
	serine	0.10449	0.97535	1.066
	threonine	0.12313	0.97535	1.1159
	ribonic acid	0.12765	0.97535	1.325
	2,3-dihydroxypyridine	0.16608	0.97535	0.62653
	4-aminobutyric acid	0.1735	0.97535	0.8472
	maltose	0.17615	0.97535	1.325
	threonic acid	0.17824	0.97535	0.82014
	1-monoolein	0.19003	0.97535	1.2868
	ornithine	0.19177	0.97535	0.82538
	glucose	0.20562	0.97535	0.84671
	2-monoolein	0.21088	0.97535	1.2071
	lactic acid	0.21276	0.97535	1.1114
	stearic acid	0.21856	0.97535	0.88173
	pyruvic acid	0.22167	0.97535	0.75257
	myristic acid	0.2299	0.97535	0.81526
	butyrolactam NIST	0.24103	0.97535	0.89662
	asparagine	0.256	0.97535	1.1503
	hexitol	0.28638	0.97535	0.85315
	glycine	0.28893	0.97535	0.88852
	oxalic acid	0.29475	0.97535	0.88887
	arachidic acid	0.29735	0.97535	0.89475
	alanine	0.29803	0.97535	1.052
	citric acid	0.31039	0.97535	1.1143
	cholestan-3-ol	0.32155	0.97535	1.1056
	hydroxycarbamate NIST	0.34091	0.97535	1.3781
	glycolic acid	0.34952	0.97535	1.1648
	isothreonic acid	0.36575	0.97535	1.1091
	adenine	0.37856	0.97535	1.0676
	hydroxylamine	0.39891	0.97535	1.3109
	pyrophosphate	0.39922	0.97535	1.1978
	pentadecanoic acid	0.40094	0.97535	1.077
	urea	0.40612	0.97535	1.0674
	phosphoethanolamine	0.41508	0.97535	1.2255
	diacetone alcohol NIST	0.4198	0.97535	0.89953
	malic acid	0.42052	0.97535	0.93558
	lyxitol	0.43855	0.97535	1.0817
	ethanolamine	0.44144	0.97535	1.0925
	succinic acid	0.44267	0.97535	0.7636
	adenosine-5-monophosphate	0.44725	0.97535	0.85996
	beta-glycerolphosphate	0.44802	0.97535	0.87219
	taurine	0.44809	0.97535	0.9125
	cysteine	0.46022	0.97535	0.93745
	3-hydroxybutyric acid	0.47141	0.97535	0.83085
	heptadecanoic acid	0.48256	0.97535	0.94333
	inosine	0.48278	0.97535	0.8666
	2-hydroxyglutaric acid	0.48904	0.97535	1.216
	galactose	0.50392	0.97535	0.78375
	adenosine	0.50431	0.97535	1.407
	5'-deoxy-5'-methylthioadenosine	0.50609	0.97535	0.91815
	3-hydroxy-3-methylglutaric acid	0.51662	0.97535	1.1
	palmitic acid	0.51732	0.97535	0.94601
	methyltetrahydrophenanthrenone NIST	0.5313	0.97535	1.1202
	dodecanoic acid, isopropanol ester NIST	0.53471	0.97535	1.1283
	fructose	0.54264	0.97535	1.2751
	1-monostearin	0.55031	0.97535	0.90893
	tyrosine	0.55461	0.97535	0.94245
	methionine	0.55552	0.97535	1.0485
	methanolphosphate	0.55846	0.97535	1.2182
	nicotinamide	0.56143	0.97535	1.0618
	xylitol	0.5912	0.97535	0.94802
	ribitol	0.59656	0.97535	0.93964
	glutamine	0.60151	0.97535	1.6926
	conduritol-beta-epoxide	0.61033	0.97535	1.0949
	zymosterol	0.61558	0.97535	1.0741
	glycerol-3-galactoside	0.62117	0.97535	1.5427
	homoserine	0.62918	0.97535	1.0558
	phenylalanine	0.63661	0.97535	0.97327
	pelargonic acid	0.64401	0.97535	1.1604
	glutamic acid	0.65473	0.97535	1.0335
	dehydroascorbic acid	0.68293	0.97535	1.0635
	sorbitol	0.69454	0.97535	1.0653
	erythritol	0.72332	0.97535	1.0524
	beta-alanine	0.72386	0.97535	1.0174
	tryptophan	0.74949	0.97535	1.0412
	xanthine	0.75304	0.97535	1.0363
	sucrose	0.76007	0.97535	2.6231
	hypoxanthine	0.76935	0.97535	0.99409
	arachidonic acid	0.76952	0.97535	1.0181
	uridine	0.77692	0.97535	1.0387
	N-acetylaspartic acid	0.78148	0.97535	1.0105
	guanosine	0.78477	0.97535	0.93641
	glycerol-alpha-phosphate	0.78883	0.97535	0.95114
	pantothenic acid	0.79993	0.97535	0.9882
	uracil	0.80469	0.97535	0.97139
	levoglucosan	0.81122	0.97535	0.97115
	aconitic acid	0.8128	0.97535	0.94857
	1-monopalmitin	0.82663	0.97535	1.0309
	aspartic acid	0.82759	0.97535	1.0317
	oxoproline	0.83366	0.97535	0.99268
	lysine	0.84155	0.97535	1.0759
	inositol-4-monophosphate	0.84175	0.97535	0.96542
	inosine 5'-monophosphate	0.85821	0.97535	1.0477
	phosphate	0.85885	0.97535	0.98689
	isocitric acid	0.86672	0.97535	0.92716
	glyceric acid	0.88475	0.97535	1.01
	fumaric acid	0.89547	0.97535	0.99008
	creatinine	0.90142	0.97535	1.007
	histidine	0.90439	0.97535	1.1104
	oleic acid	0.90568	0.97535	0.99919
	cholesterol	0.92636	0.98812	0.96898
	*Data from non-targeted primary metabolomics analysis of Tat-SIRT5-/- and ΨεRACK-SIRT5-/- cortex. Only structurally annotated metabolites are presented. Fold change is with respect to Tat-SIRT5-/-
